# Supplementary material for: Rational design of diketopyrrolopyrrole-based oligomers for high performance small molecular photovoltaic materials via an extended framework and multiple fluorine substitution
Source: Royal Society of Chemistry journal article supplement (doi:10.1039/c5ta00367a), 2015-01-01
Supplement: c5ta00367a1.pdf [file c5ta00367a1.pdf]

## Supporting Information

### **Rational design of diketopyrrolopyrrole-based oligomers for high performance small molecular photovoltaic materials *via* extended framework and multiple fluorine substitution**

*Qing-Ru Yin, Jing-Sheng Miao, Zhuo Wu, Zheng-Feng Chang, Jin-Liang Wang,\*  
Hong-Bin Wu,\* and Yong Cao*

Prof. J.-L. Wang, Q.-R. Yin, <sup>[†]</sup> Z. Wu, <sup>[†]</sup> Z.-F. Chang,  
Beijing Key Laboratory of Photoelectronic/Electrophotonic Conversion Materials,  
Key Laboratory of Cluster Science of Ministry of Education, School of Chemistry,  
Beijing Institute of Technology, 5 South Zhongguancun Street, Beijing, 100081,  
China.

E-mail: jinliwang@bit.edu.cn

J. -S. Miao, <sup>[†]</sup> Prof. H.-B. Wu, Prof. Y. Cao

Institute of Polymer Optoelectronic Materials and Devices, State Key Laboratory of  
Luminescent Materials and Devices, South China University of Technology, 381  
Wushan Road, Guangzhou, 510640, China.

E-mail: hbwu@scut.edu.cn

<sup>[†]</sup> These authors contributed equally to this work.

### **Experimental Section**

#### **SCLC device fabrication and characterization:**

The structures of hole only and electron only device are ITO/PEDOT/donor materials:

PC<sub>71</sub>BM/MoO<sub>3</sub>/Al and ITO/ZnO/PFN/ donor materials: PC<sub>71</sub>BM/Ca/Al, respectively.

The mobility was determined by fitting the dark current to the model of the field-independent space charge limited current (SCLC) according to the Mott-Gurney law,

given by  $J = \frac{9}{8} \varepsilon_0 \varepsilon_r \mu_h \frac{V^2}{L^3}$  for hole only device and  $J = \frac{9}{8} \varepsilon_0 \varepsilon_r \mu_e \frac{V^2}{L^3}$  for electron only

device

Where  $J$  is the current density,  $\varepsilon_0$  is the permittivity of free space,  $\varepsilon_r$  is the relative

permittivity of the material,  $\mu_h$  is the hole mobility,  $\mu_e$  is the electron mobility, L is the film thickness of the active layer, and V is the effective voltage which is determined by subtracting the built-in voltage ( $V_{bi}$ ) from the applied voltage ( $V = V_{appl} - V_{bi}$ ). The hole and electron mobility can be directly calculated from  $J$ - $V$  curves.

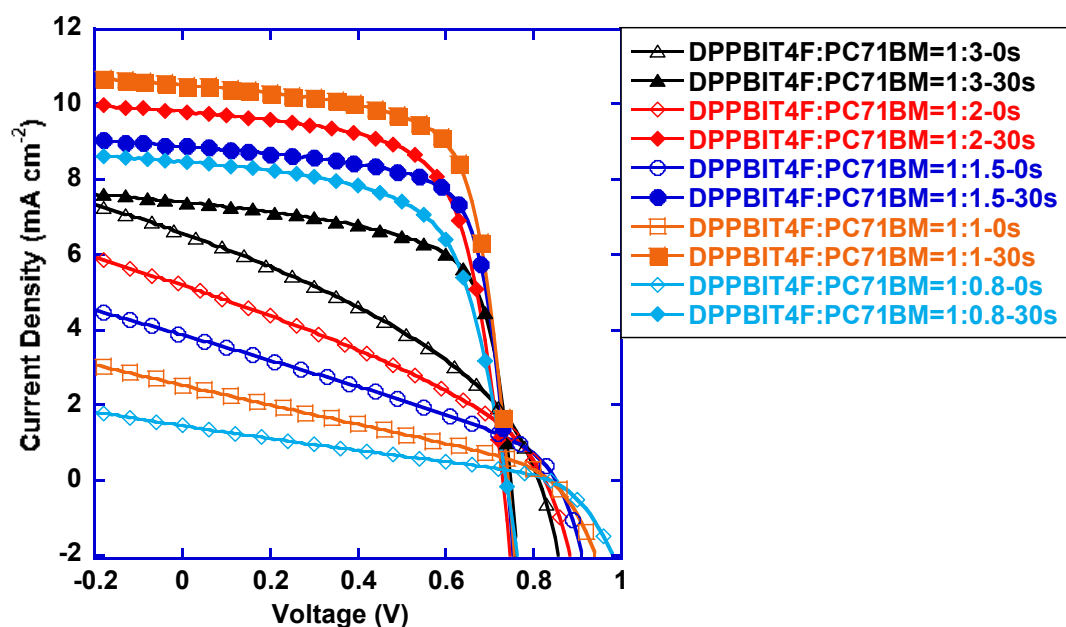

**Figure S1.** Current density-voltage ( $J$ - $V$ ) characteristics of devices based on DPPBIT4F blend with PC<sub>71</sub>BM (different blend ratio and before/after solvent treatment).

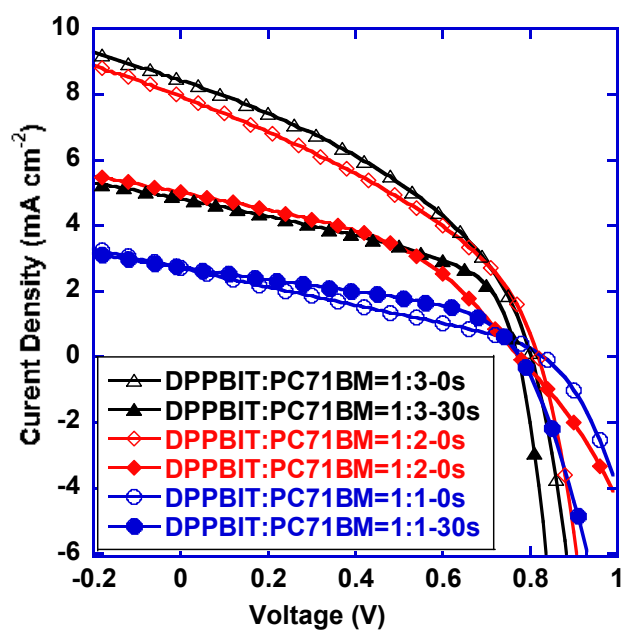

**Figure S2.** Current density-voltage ( $J$ - $V$ ) characteristics of devices based on **DPPBIT** blend with **PC<sub>71</sub>BM** (different blend ratio and before/after solvent treatment).

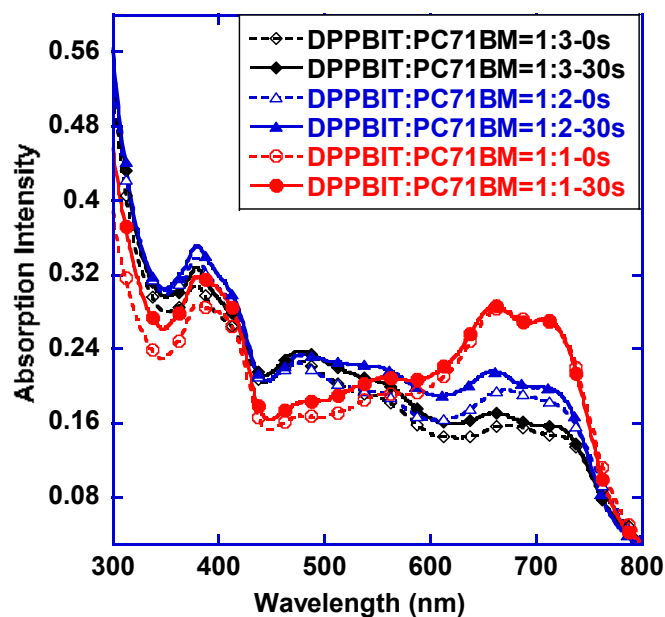

**Figure S3.** Absorption spectra of **DPPBIT: PC<sub>71</sub>BM** (1:1, 1:2, and 1:3, w/w) blend films with or without  $\text{CH}_2\text{Cl}_2$  vapor annealing.

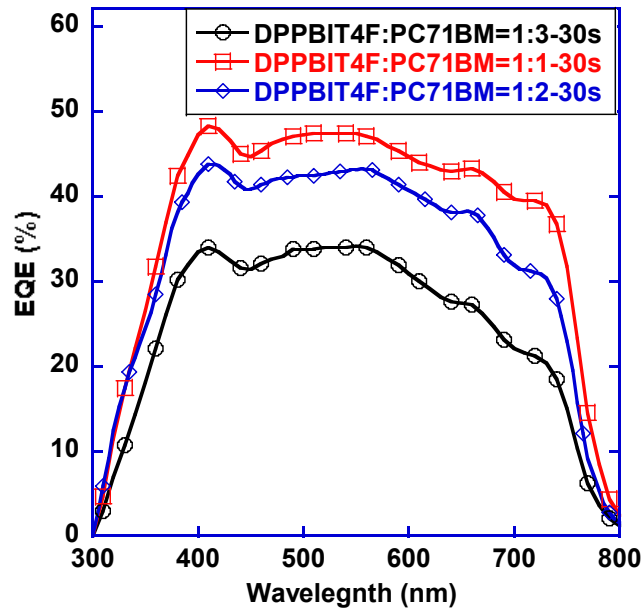

**Figure S4.** EQE plots of devices based on **DPPBIT4F** blend with **PC<sub>71</sub>BM** (1:1, 1:2, and 1:3, w/w) after **CH<sub>2</sub>Cl<sub>2</sub>** vapor annealing.

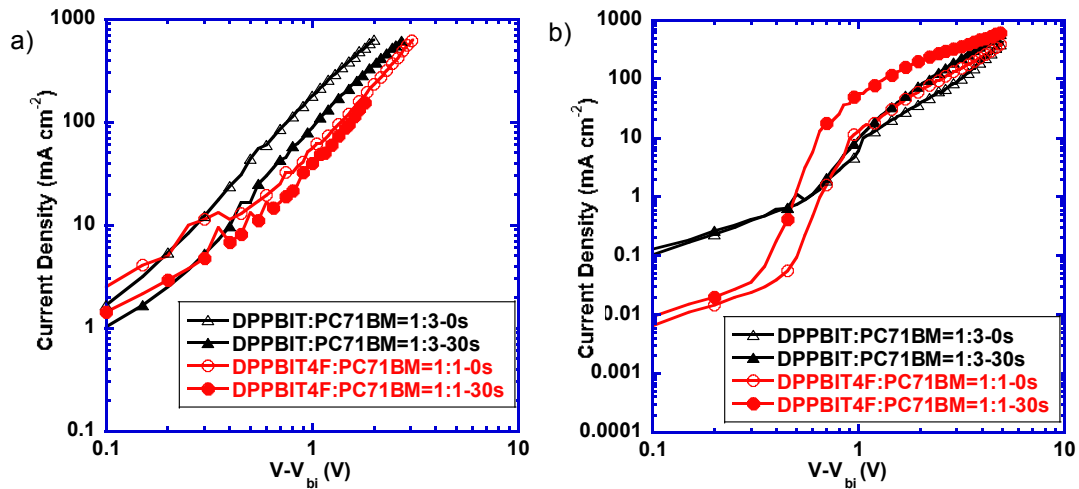

**Figure S5.** The  $J$ - $V$  plots of the devices with a configuration of ITO/PEDOT/donor materials: PC<sub>71</sub>BM/MoO<sub>3</sub>/Al for hole only device (a) and ITO/ZnO/PFN/ donor materials: PC<sub>71</sub>BM/Ca/Al for electron only device (b) before and after **CH<sub>2</sub>Cl<sub>2</sub>** vapor annealing, respectively.

# Copies of $^1\text{H}$ and $^{13}\text{C}$ NMR, and MALDI-TOF MS Spectra

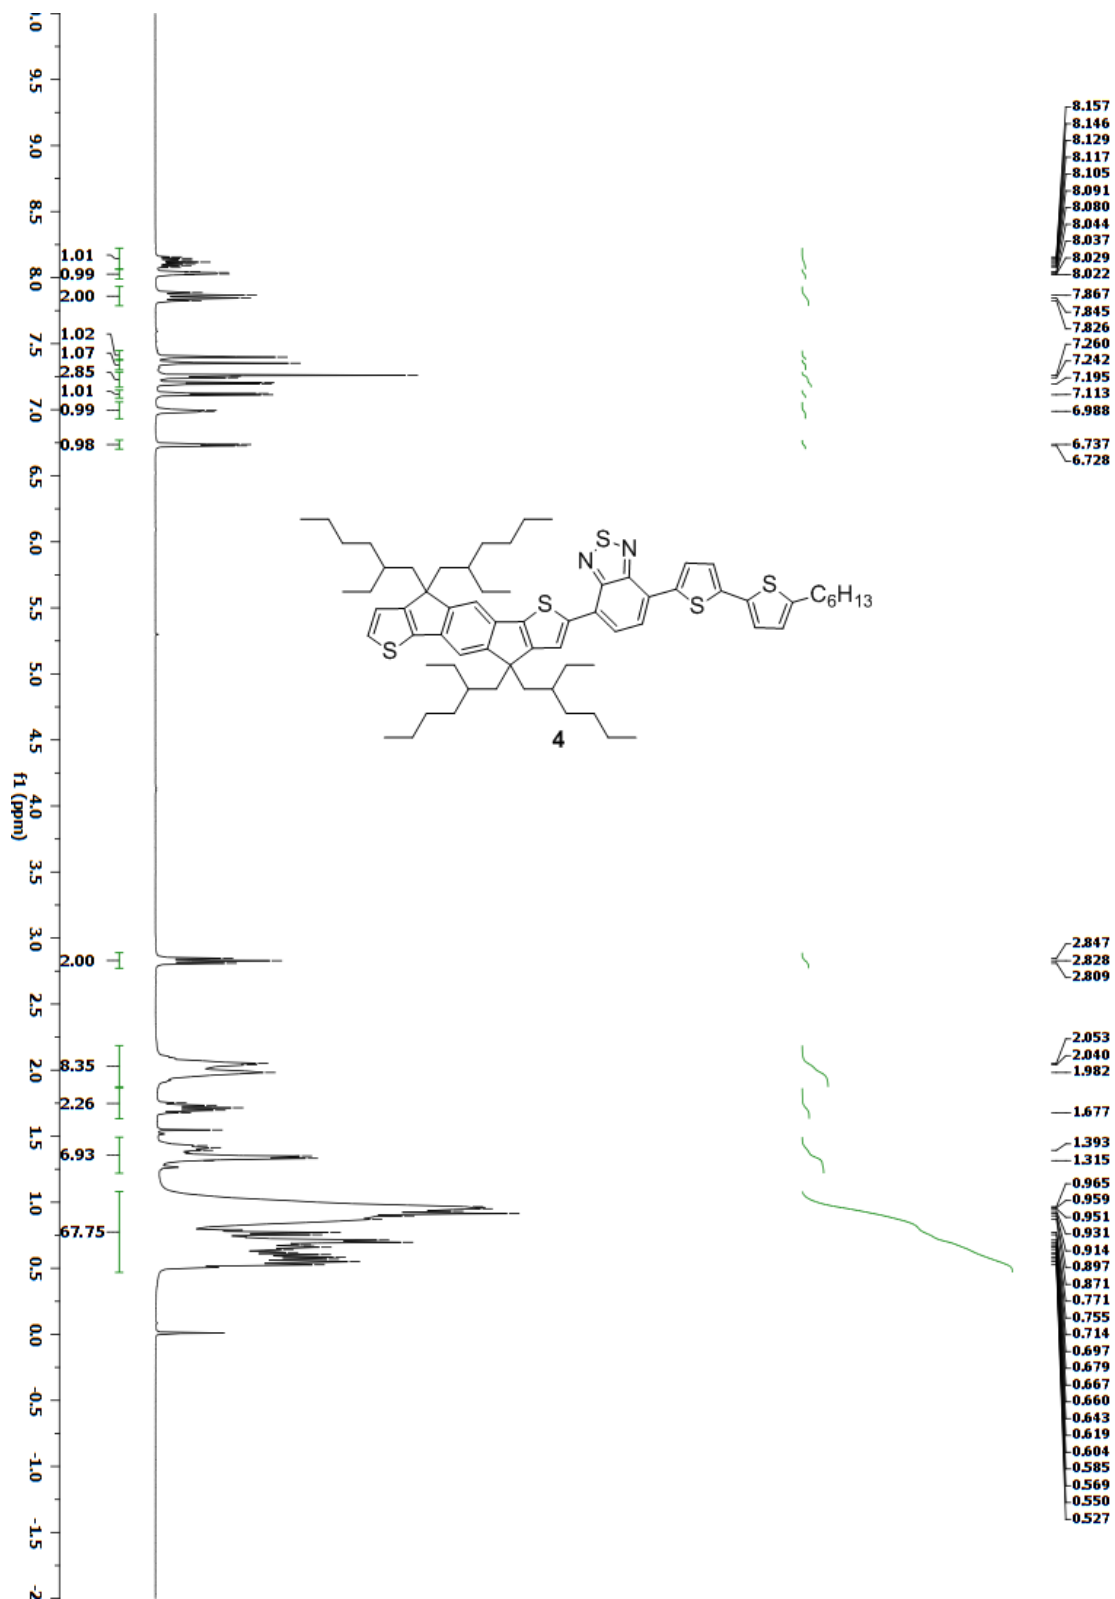

$^1\text{H}$  NMR spectrum for compound **4**

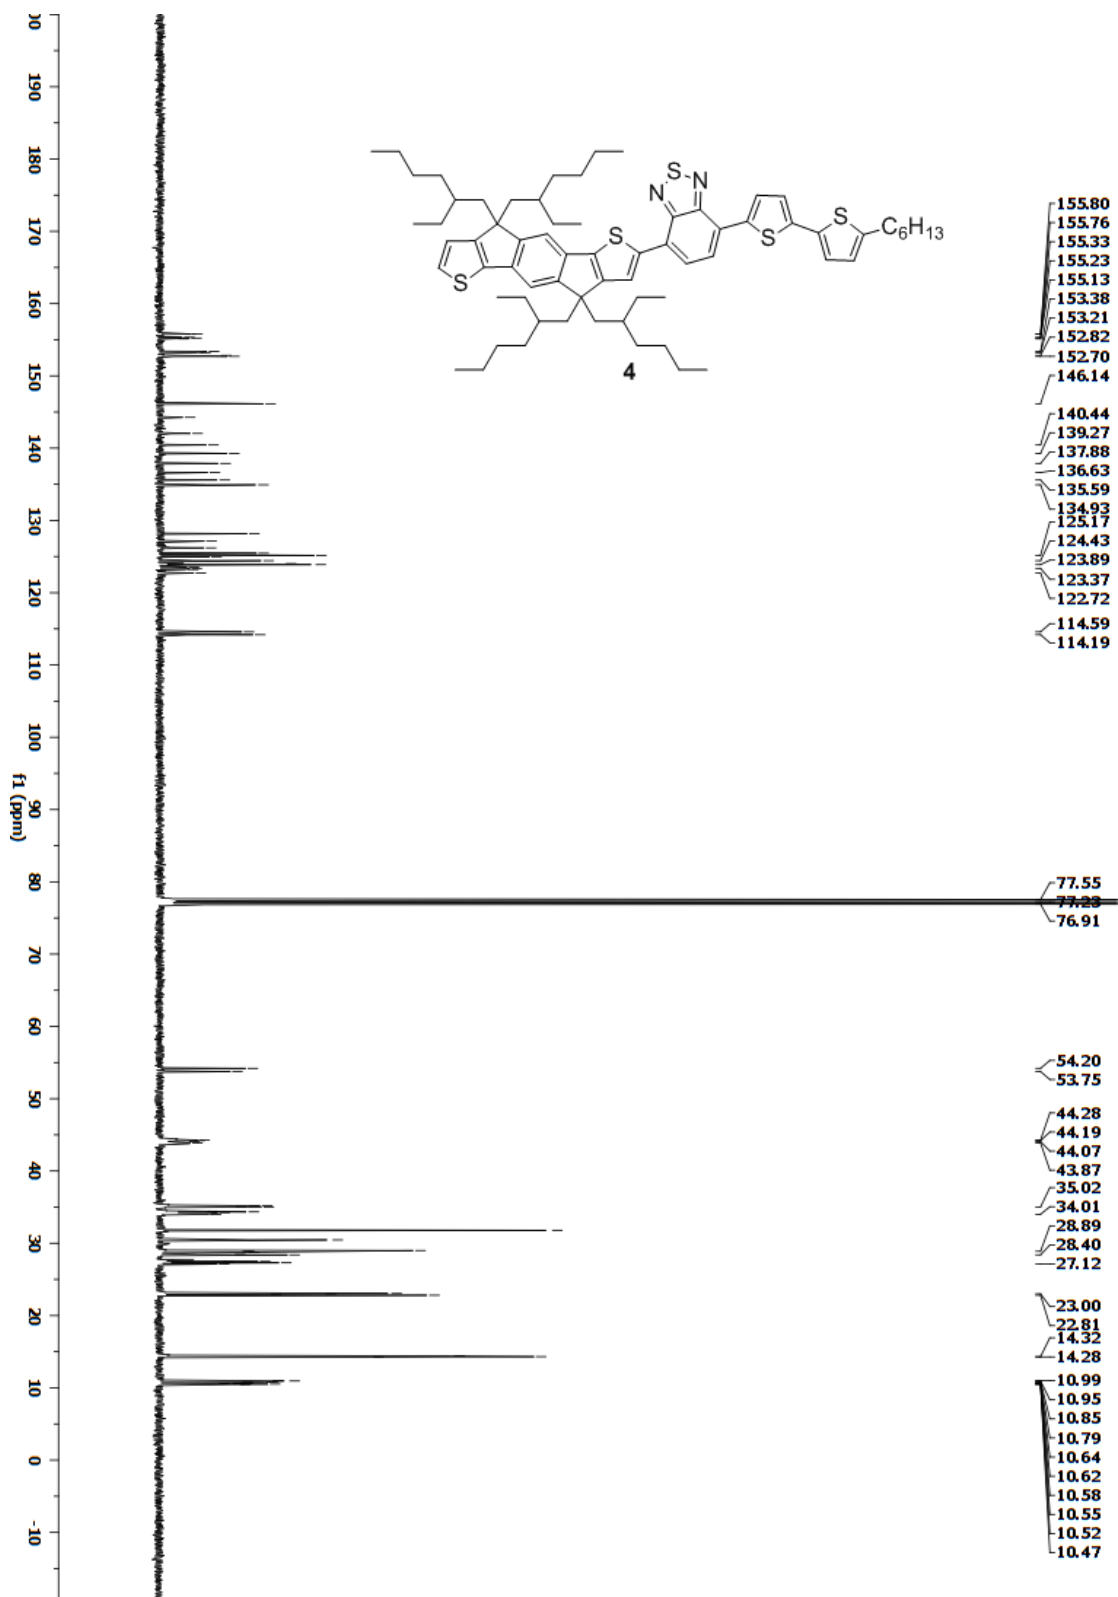

$^{13}\text{C}$  NMR spectrum for compound 4.

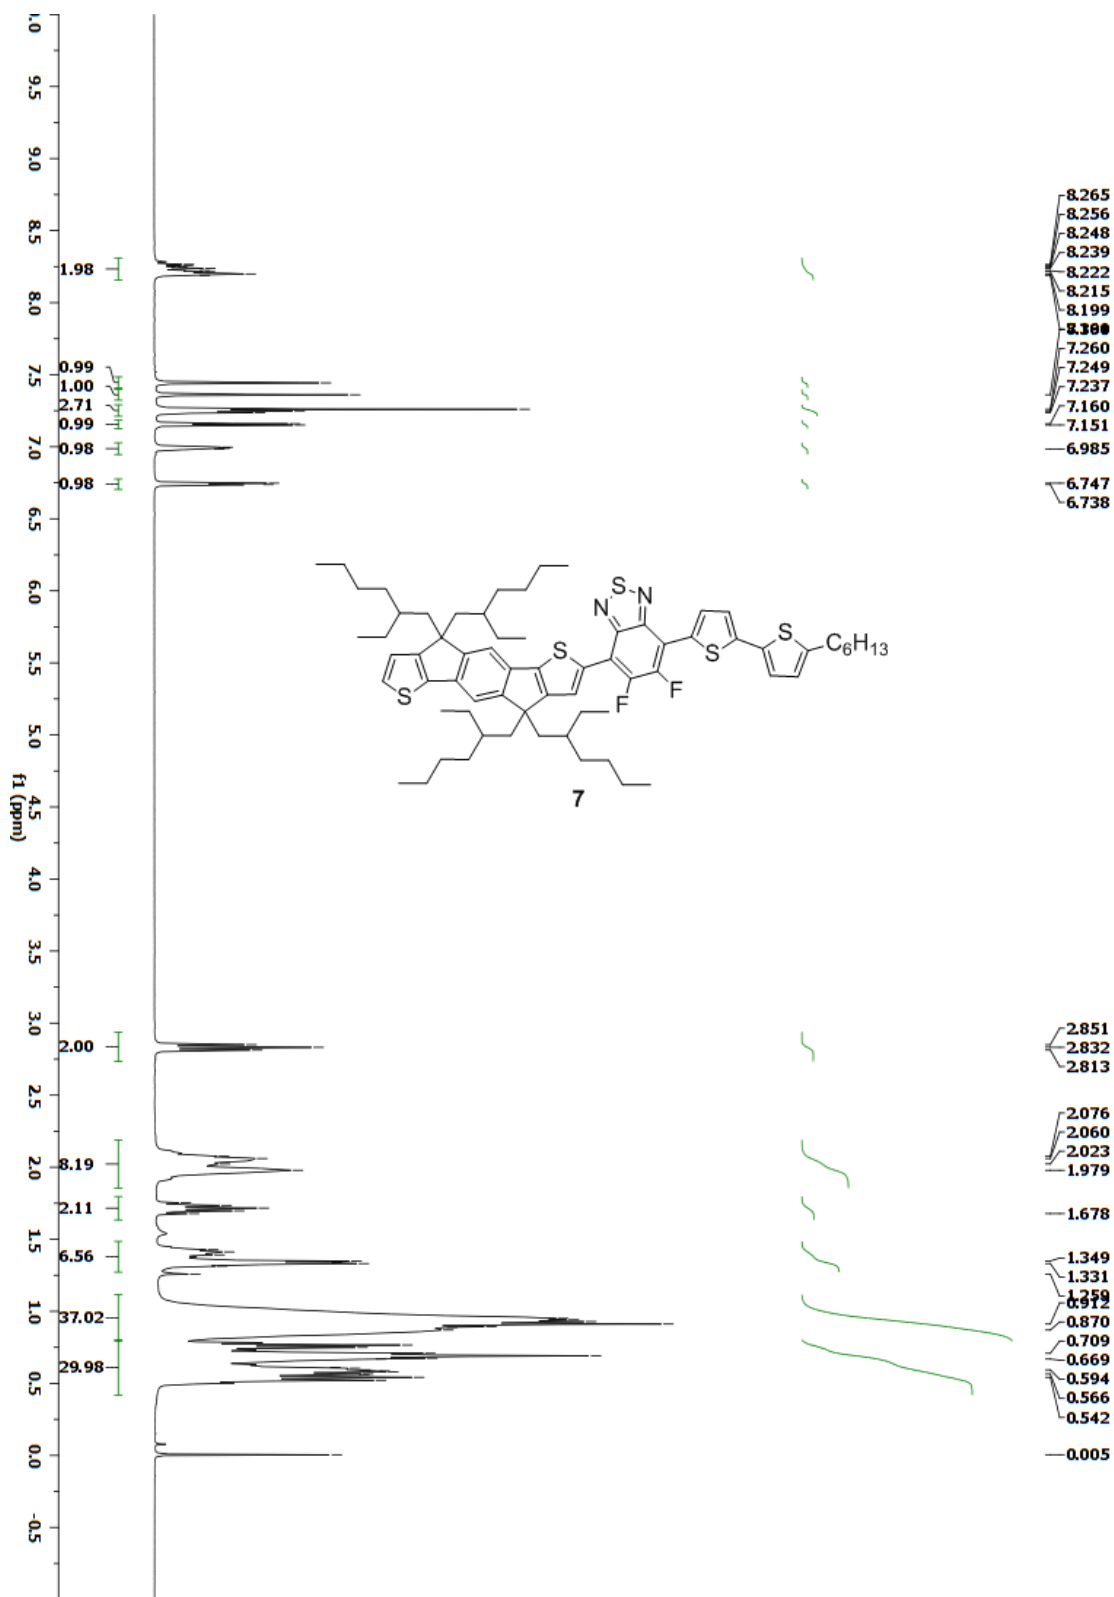

<sup>1</sup>H NMR spectrum for compound 7

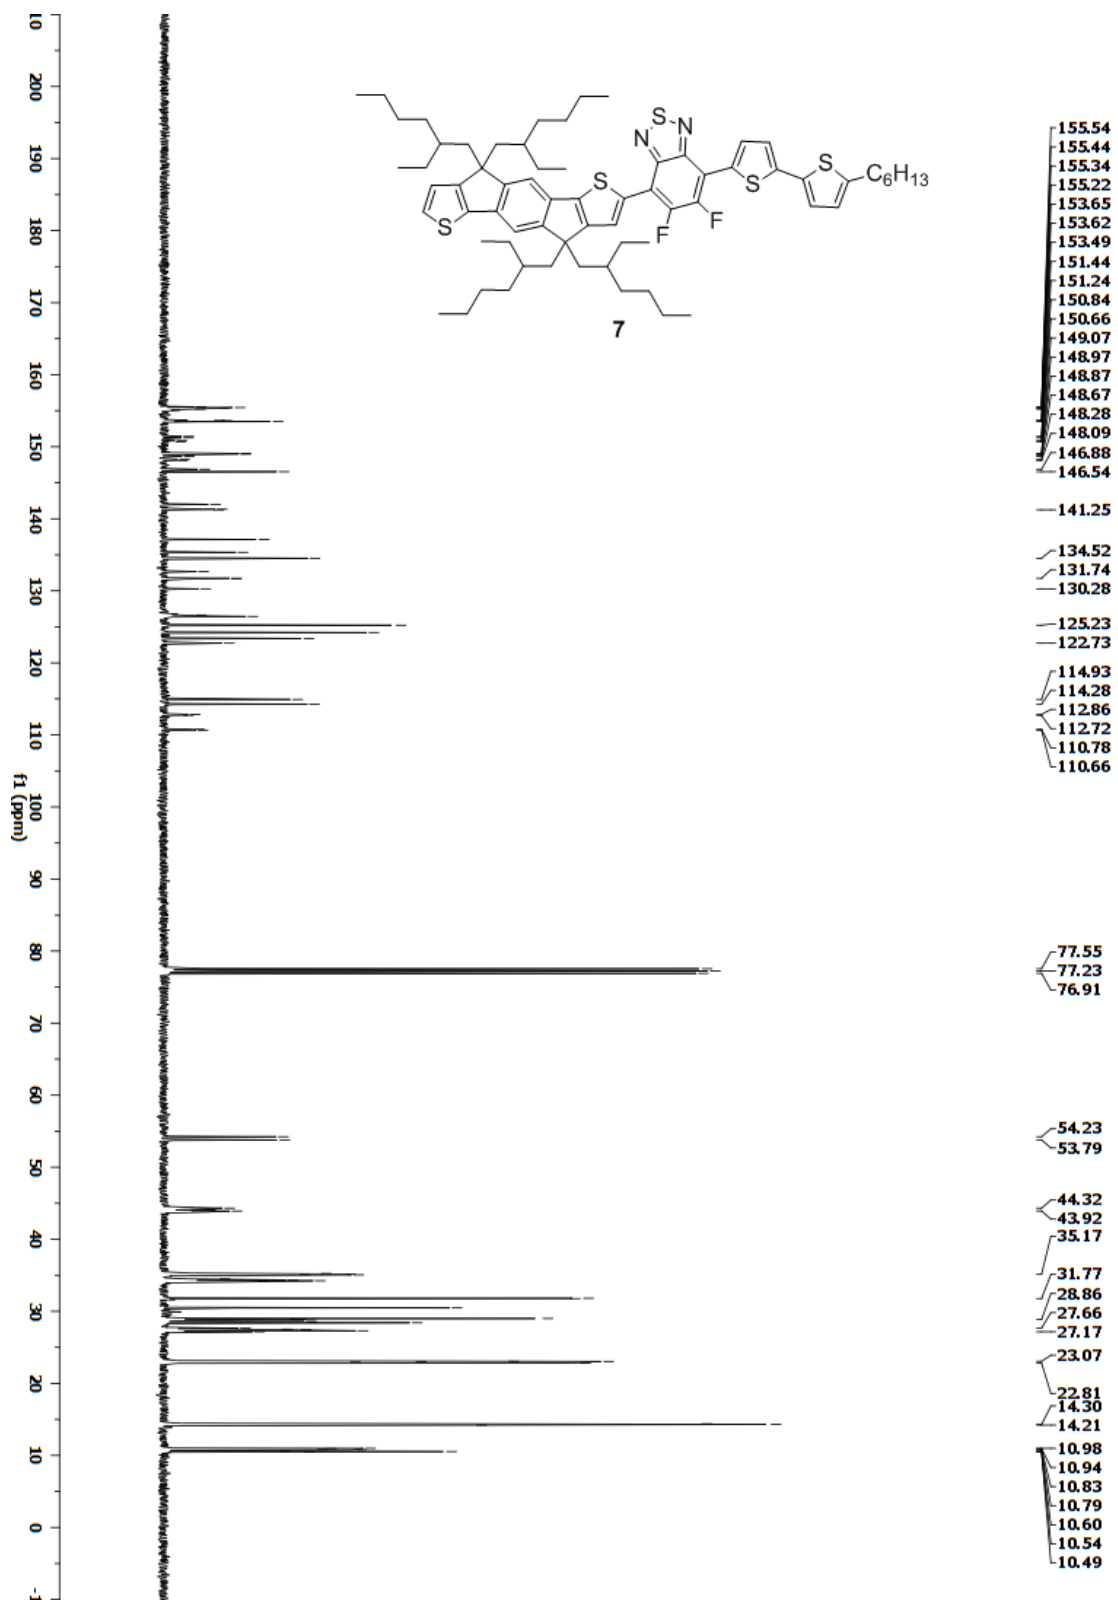

<sup>13</sup>C NMR spectrum for compound 7.



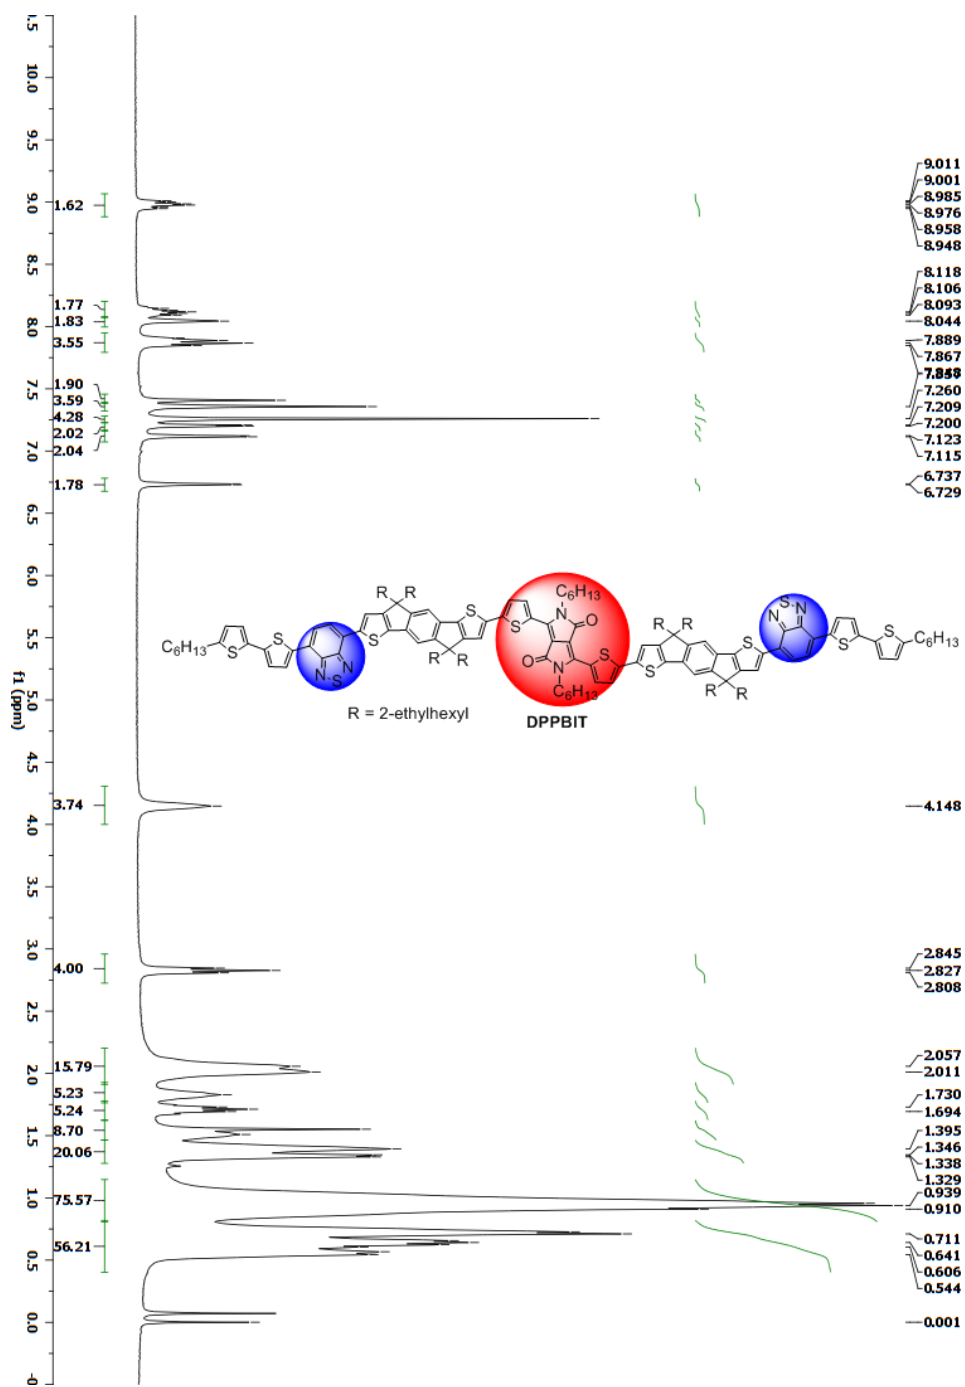

<sup>1</sup>H NMR spectrum for **DPPBIT**

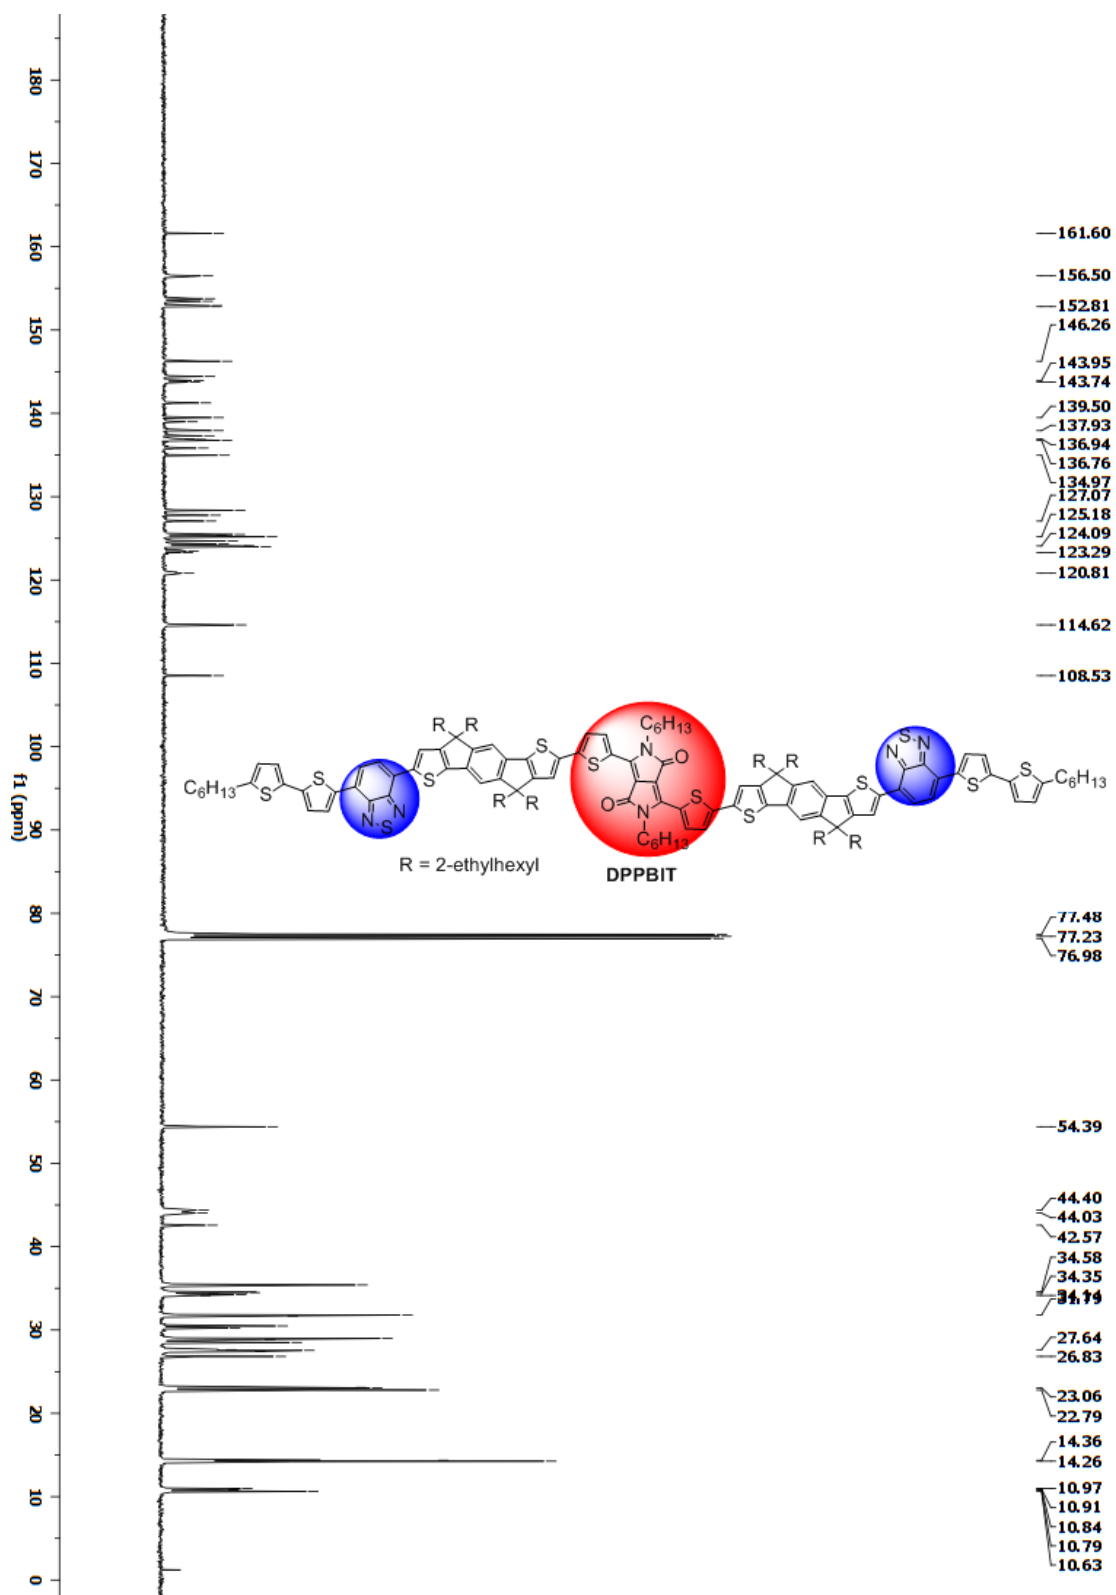

<sup>13</sup>C NMR spectrum for DPPBIT.

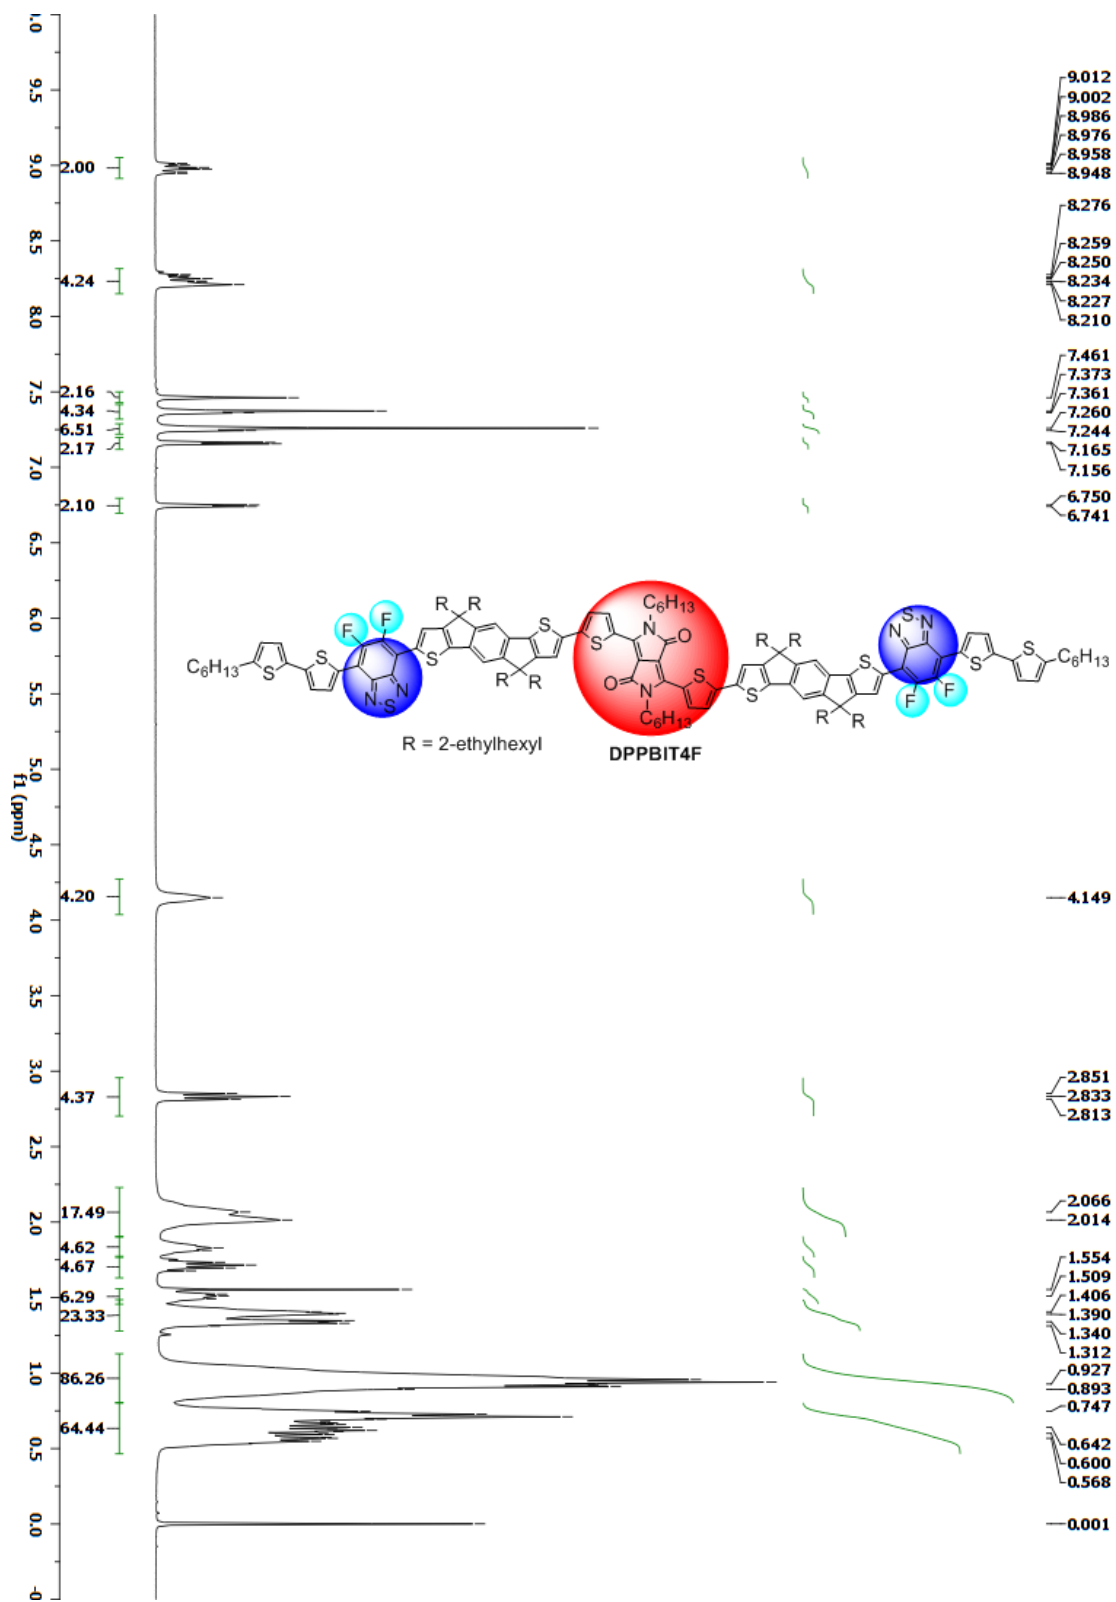

$^1\text{H}$  NMR spectrum for DPPBIT4F

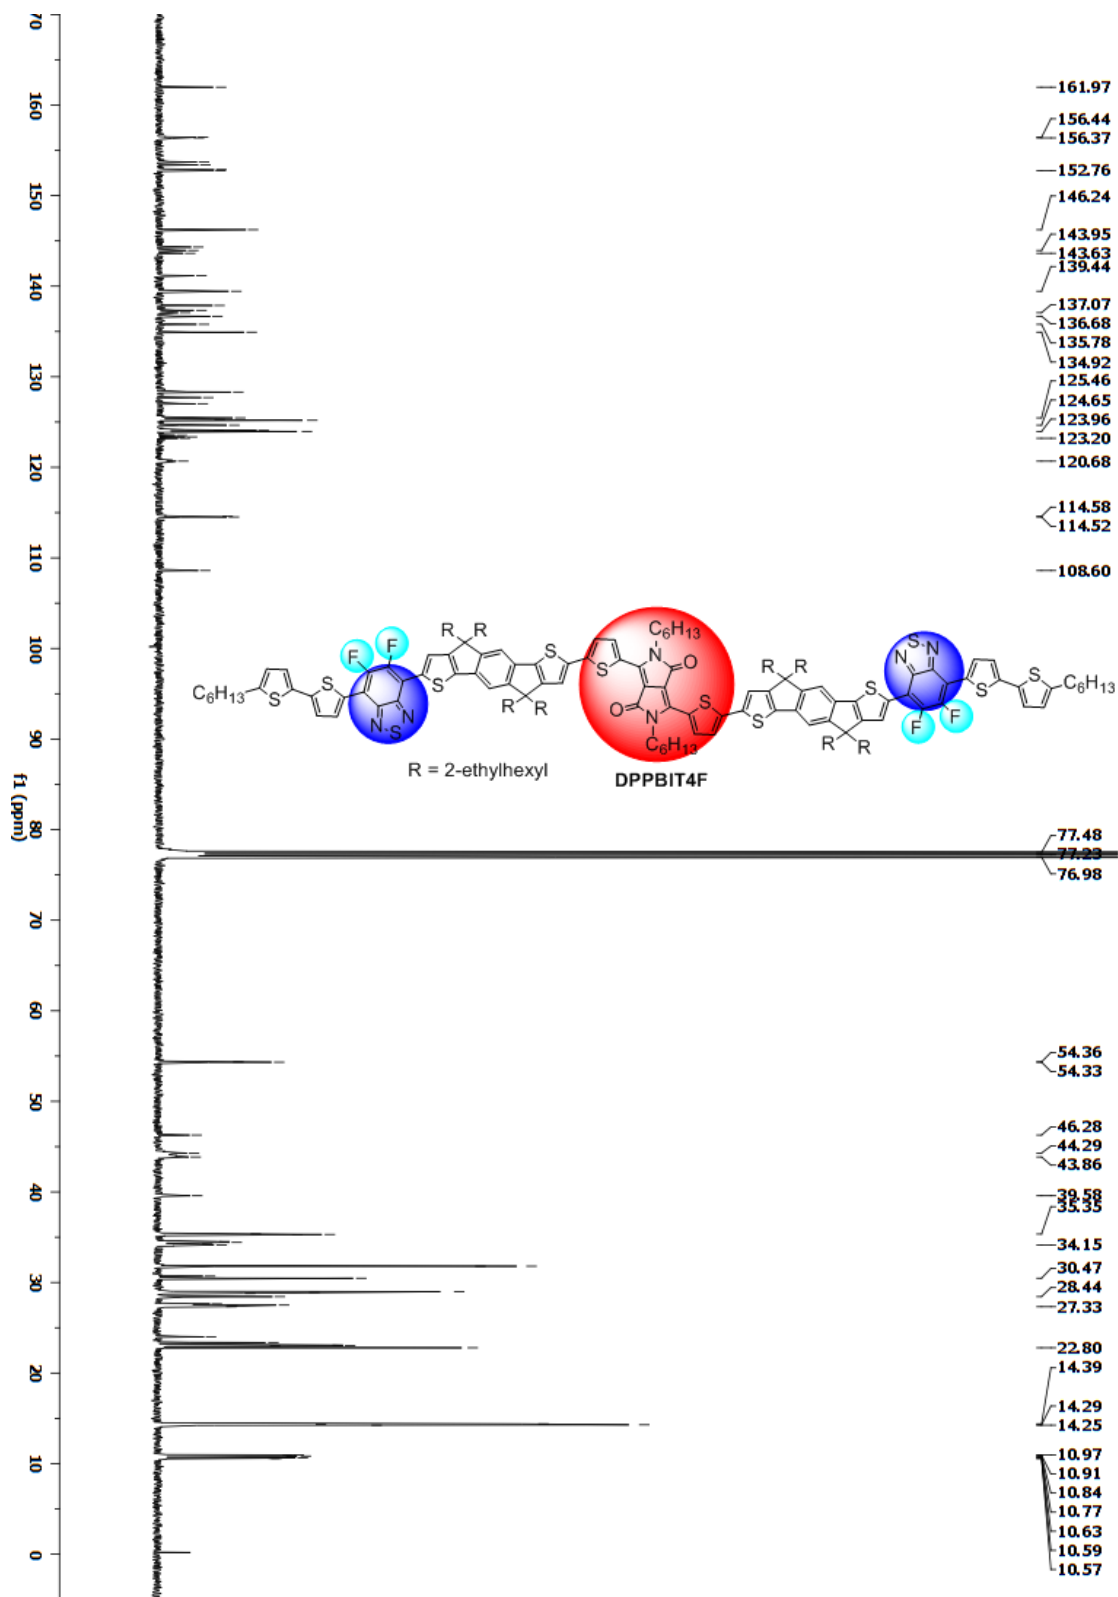

<sup>13</sup>C NMR spectrum for DPPBIT4F.

### MALDI-TOF,CCA,BTIDTPPC6,20141119

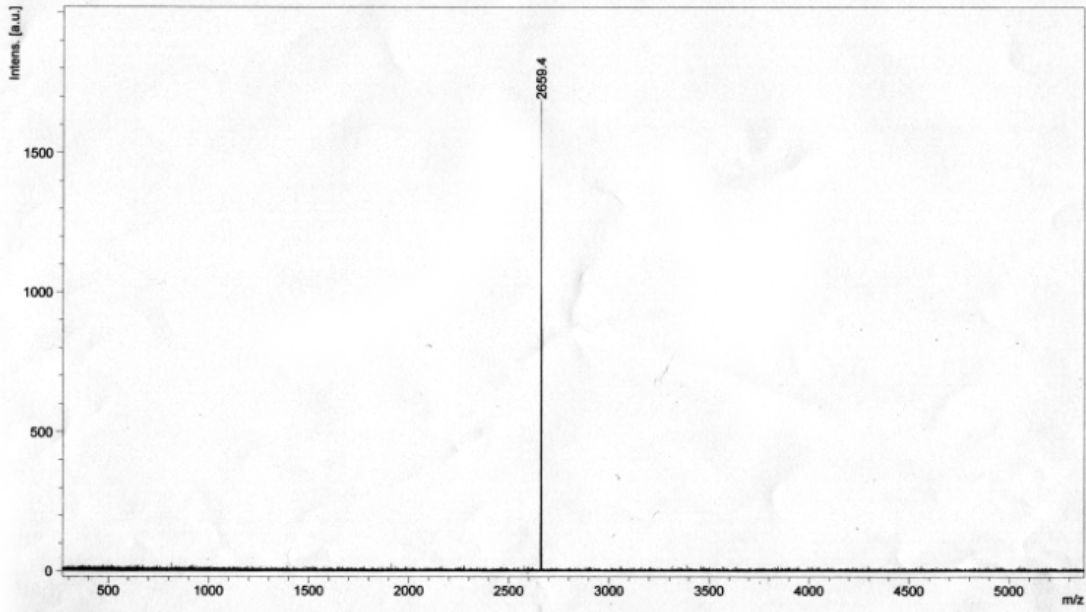

### MALDI-TOF,CCA,BTIDTPPC6,20141119

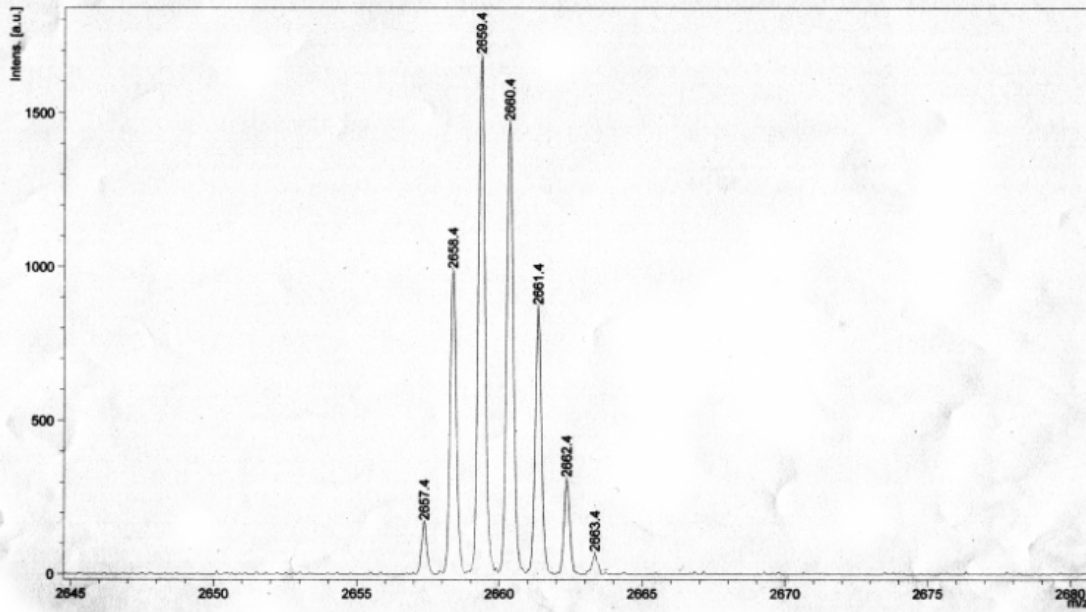

MALDI-TOF mass spectrum of DPPBIT.

### MALDI-TOF,CCA,DPPIDT2F,20131217

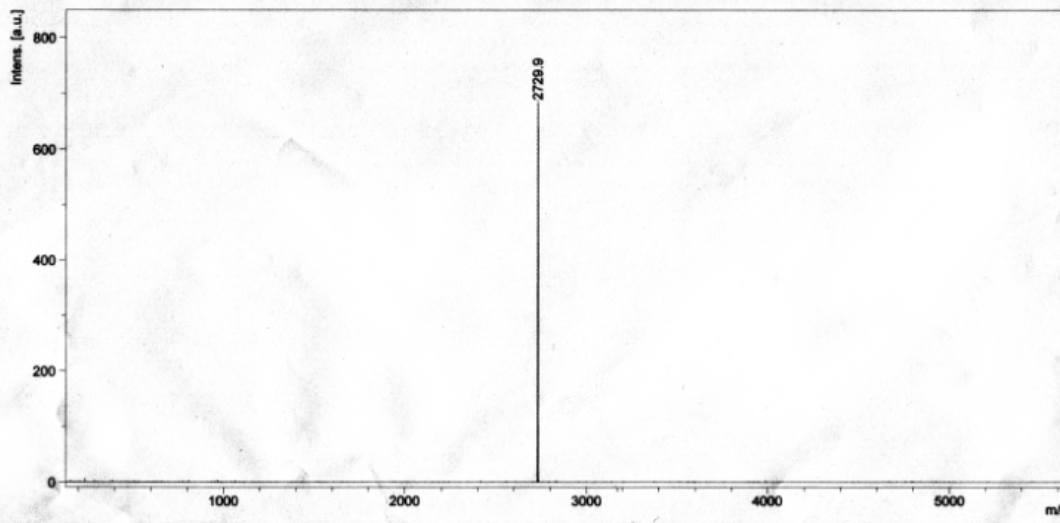

### MALDI-TOF,CCA,DPPIDT2F,20131218

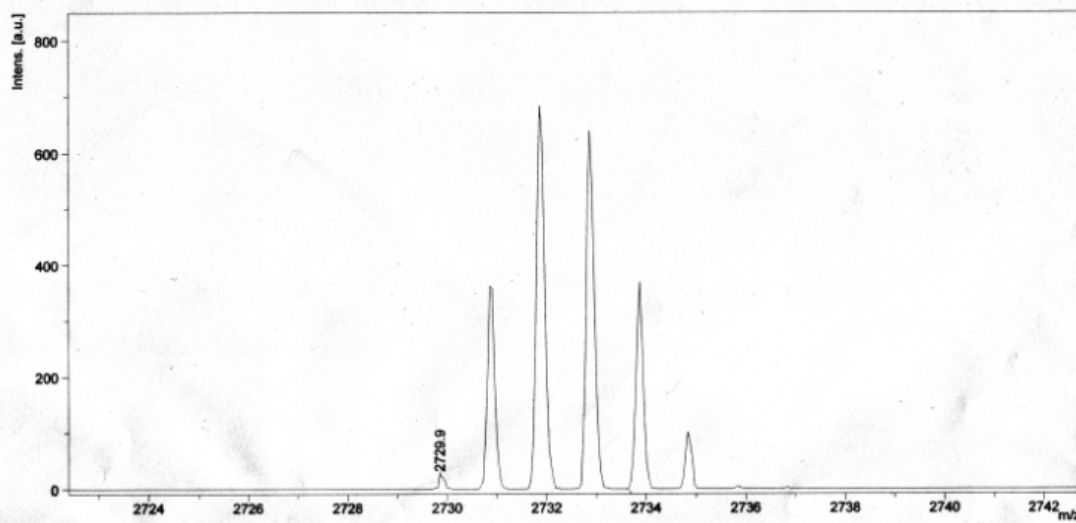

MALDI-TOF mass spectrum of **DPPBIT4F**.
